# Supplementary material for: Photo(electro)catalytic activity enhancement of PhC2Cu by Fe doping induced energy band modulation and luminescence chromism switching
Source: Royal Society of Chemistry journal article supplement (doi:10.1039/d0cy02355h), 2021-01-01
Supplement: d0cy02355h1.pdf [file d0cy02355h1.pdf]

# Photo(electro)catalytic activity enhancement of $\text{PhC}_2\text{Cu}$ by Fe doping induced energy band modulation and luminescence chromism switching

Jing Qian<sup>a</sup>, Wenqiang Dang<sup>b</sup>, Jing Li<sup>a</sup>, Wen Zhang<sup>a</sup>, Meng Tian<sup>a</sup>,

Ning Wang<sup>a</sup>, Wenjing Song<sup>b</sup>, Lingling Lv<sup>d</sup>, Hai-Ying Jiang<sup>\*a</sup>

<sup>a</sup> Key Lab of Synthetic and Natural Functional Molecule Chemistry of Ministry of Education, and the Energy and Catalysis Hub, College of Chemistry and Materials Science, Northwest University, Xi'an 710127, People's Republic of China

<sup>b</sup> Department of Physics, Tianshui Normal University, Tianshui, Gansu, 741001, People's Republic of China

<sup>c</sup> Key Laboratory of Photochemistry, CAS Research/Education Center for Excellence in Molecular Sciences, Institute of Chemistry, Chinese Academy of Sciences, Beijing, 100190, People's Republic of China

<sup>d</sup> College of Chemical Engineering and Technology, Tianshui Normal University, Tianshui, Gansu, 741001, People's Republic of China

[jianghy@nwu.edu.cn](mailto:jianghy@nwu.edu.cn)

## Theoretical calculations

The theoretical calculations were carried out using the plane wave pseudopotential DFT<sup>1</sup> method using the projector augmented wave (PAW) pseudopotentials<sup>2,3</sup> implemented using the Vienna abinitio simulation program (VASP).<sup>3</sup> The GGA scheme was employed. The valence configurations including valence and semicore electrons are  $2s^22p^2$  for carbon,  $3d^{10}4p^1$  for copper and  $3d^74s^1$  for iron according to the PAW scheme.<sup>1</sup> The cutoff energy is 450 eV and the Monkhorst-Pack<sup>4</sup> k-point mesh for the 56-atom-supercell was  $2 \times 5 \times 3$ , 112-atom-supercell  $2 \times 3 \times 3$  and 168-atom-supercell  $2 \times 2 \times 3$ , respectively. We performed structural relaxations of the crystal until the total energy was converged to  $10^{-5}$  eV and the residual forces on atoms were below  $0.02 \text{ eV } \text{\AA}^{-1}$ .

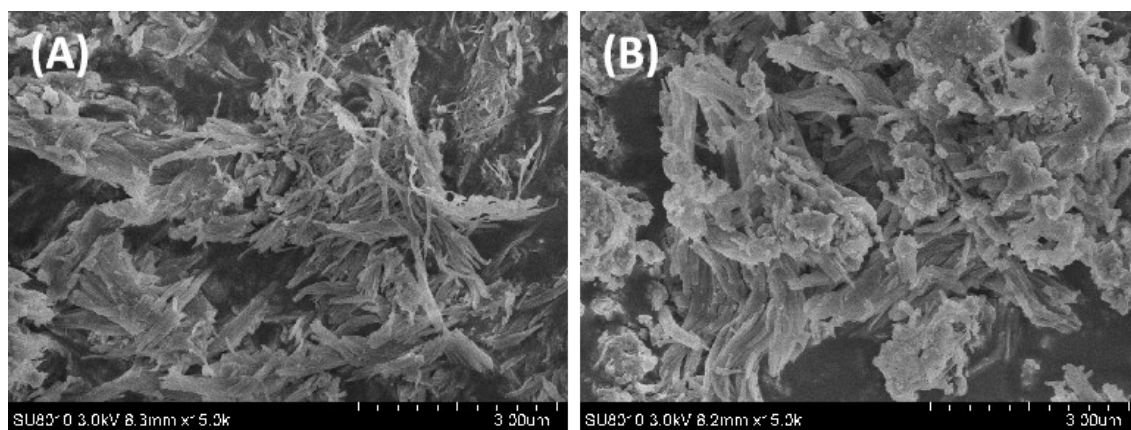

**Figure S1** (A) SEM image of  $\text{PhC}_2\text{Cu}$ ; (B) SEM image of 2% Fe/ $\text{PhC}_2\text{Cu}$ .

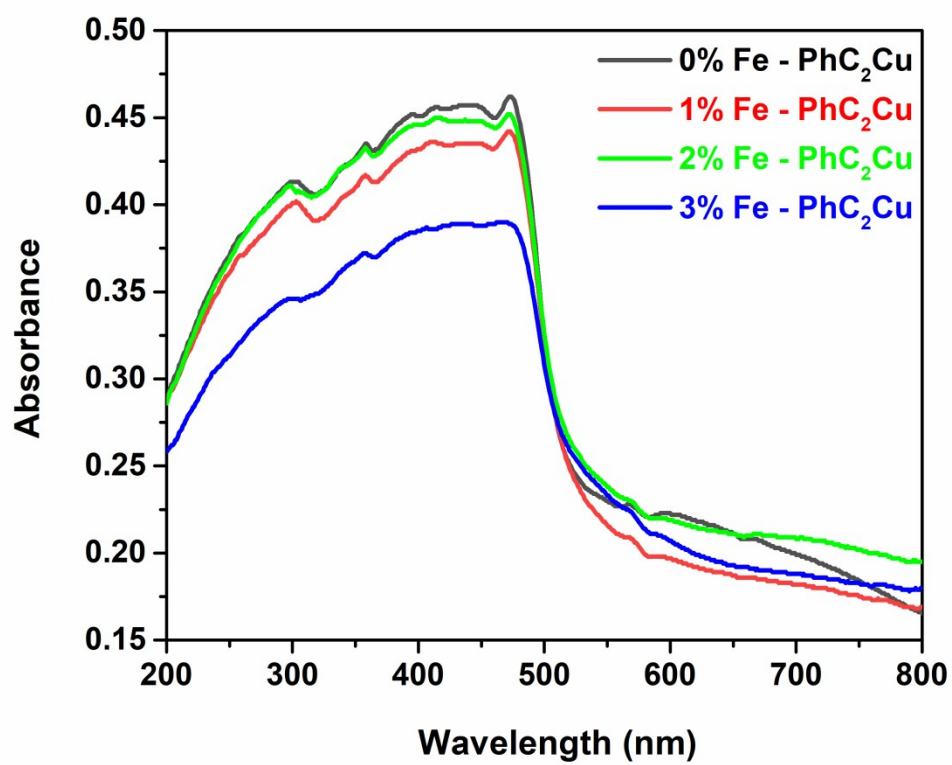

**Figure S2** UV-vis DRS spectra of the as-prepared Fe- $\text{PhC}_2\text{Cu}$  samples.

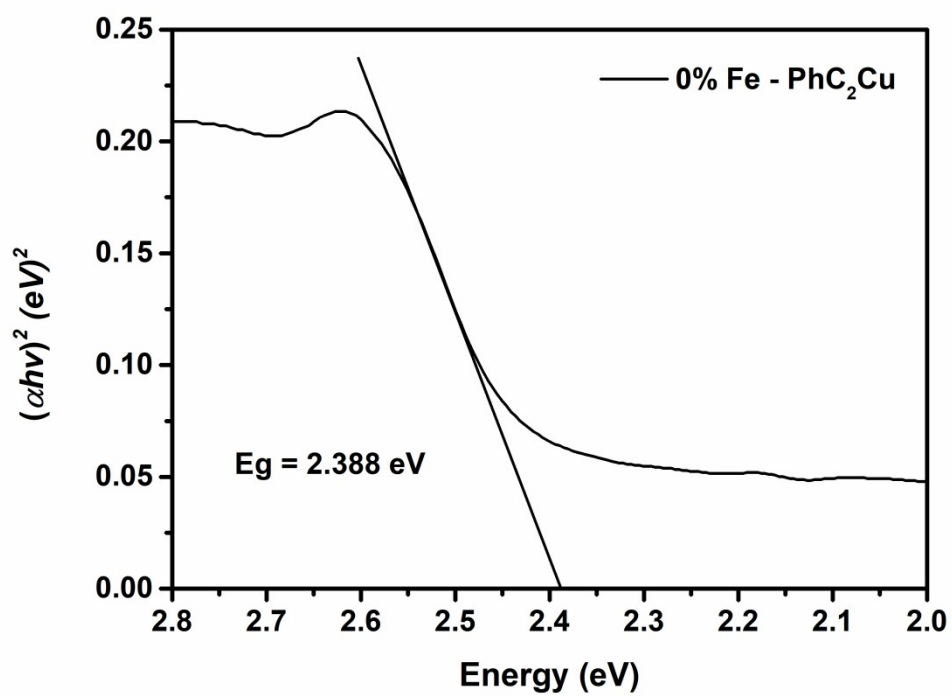

**Figure S3** Tauc plot curve of 0% Fe-PhC<sub>2</sub>Cu.

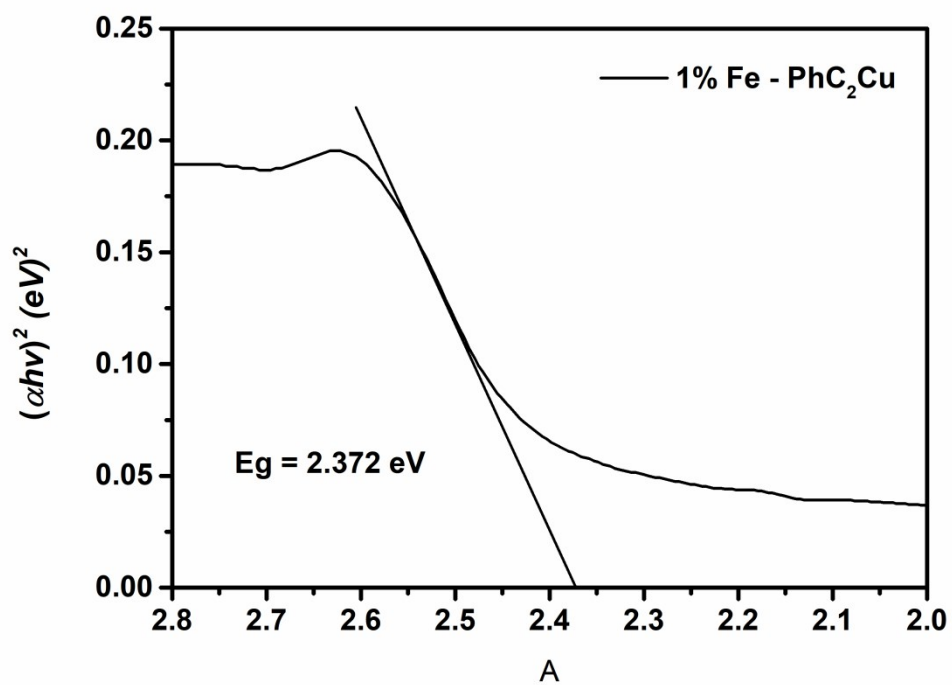

**Figure S4** Tauc plot curve of 1% Fe-PhC<sub>2</sub>Cu.

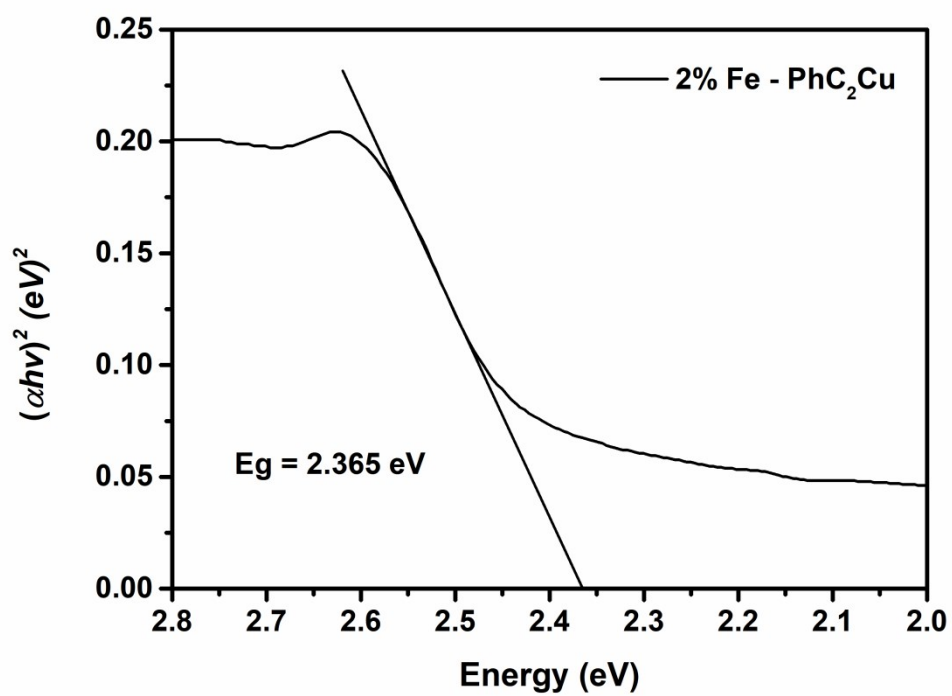

Figure S5 Tauc plot curve of 2% Fe-PhC<sub>2</sub>Cu.

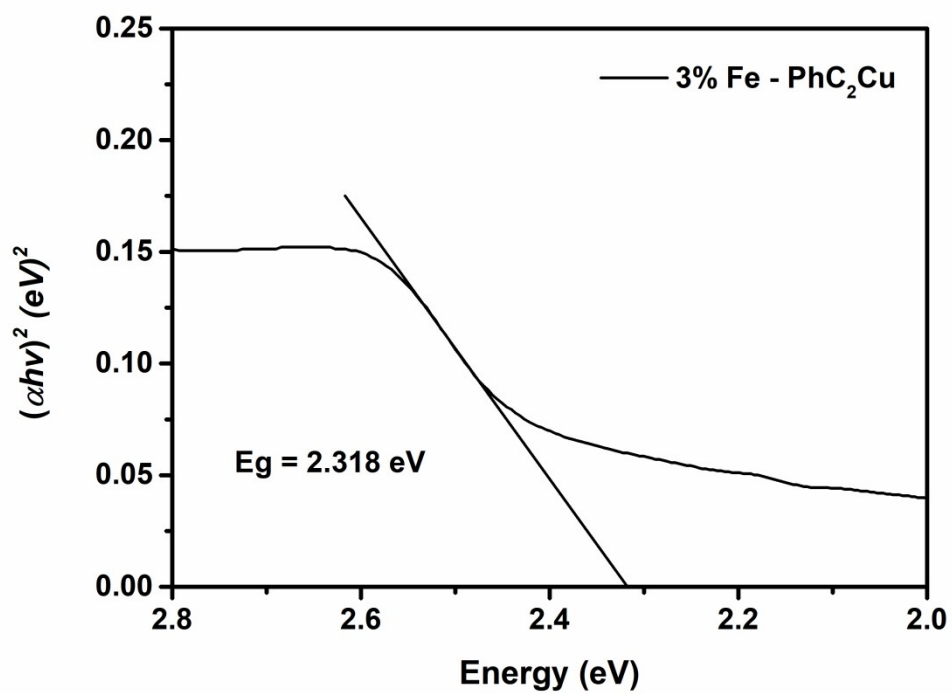

Figure S6 Tauc plot curve of 3% Fe-PhC<sub>2</sub>Cu.

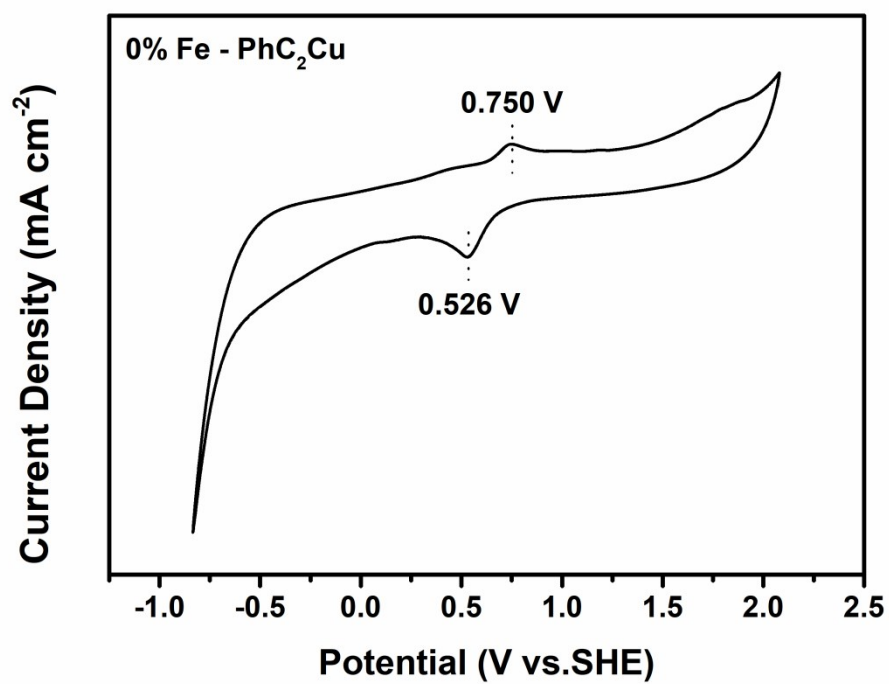

**Figure S7** Cyclic voltammetry curve of 0% Fe-PhC<sub>2</sub>Cu.

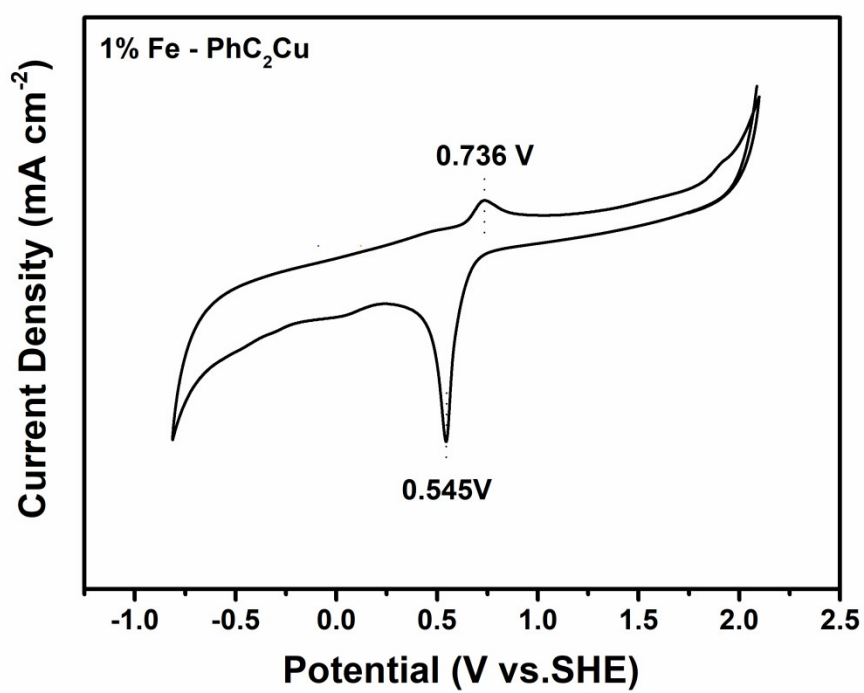

**Figure S8** Cyclic voltammetry curve of 1% Fe-PhC<sub>2</sub>Cu.

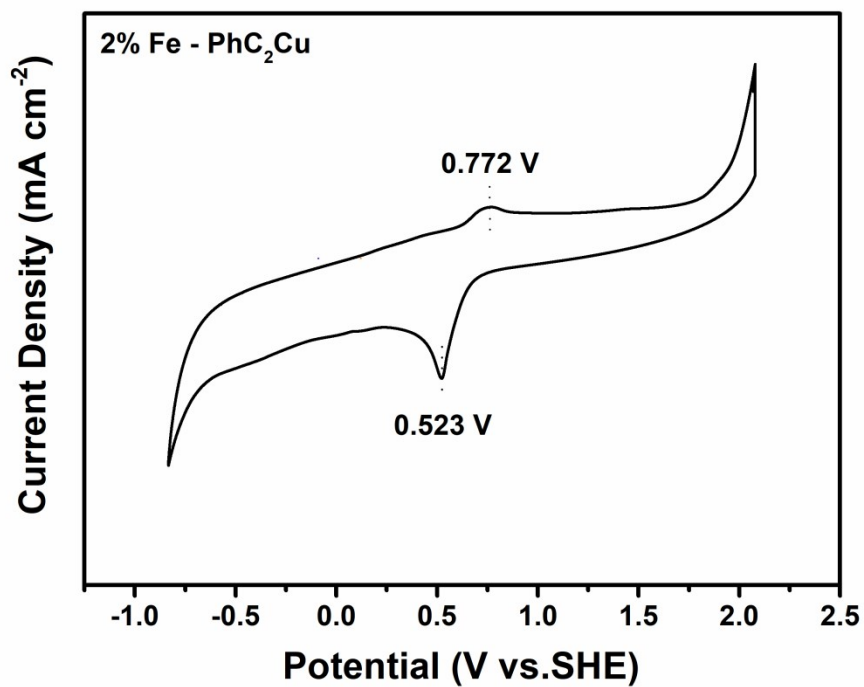

**Figure S9** Cyclic voltammetry curve of 2% Fe-PhC<sub>2</sub>Cu.

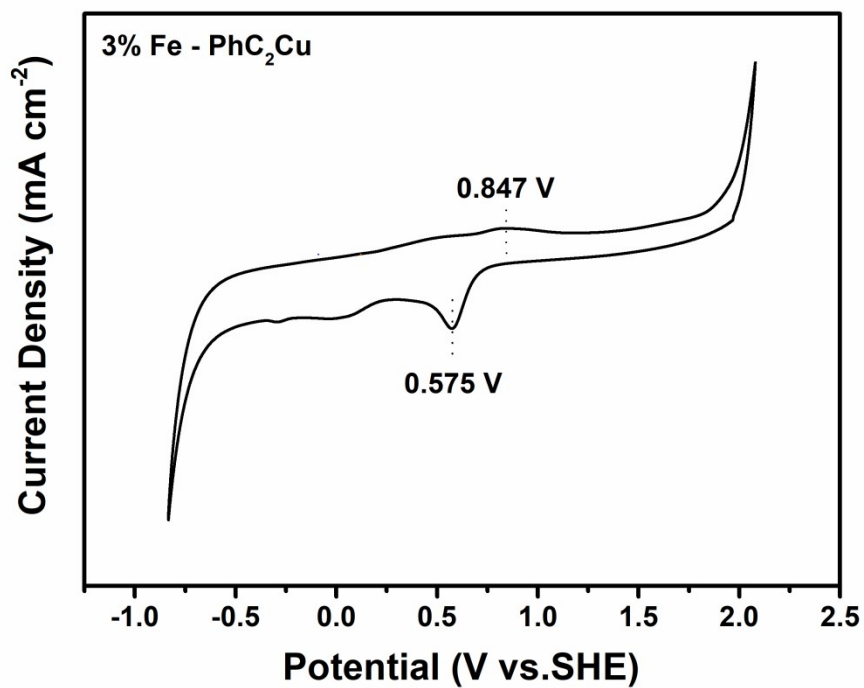

**Figure S10** Cyclic voltammetry curve of 3% Fe-PhC<sub>2</sub>Cu.

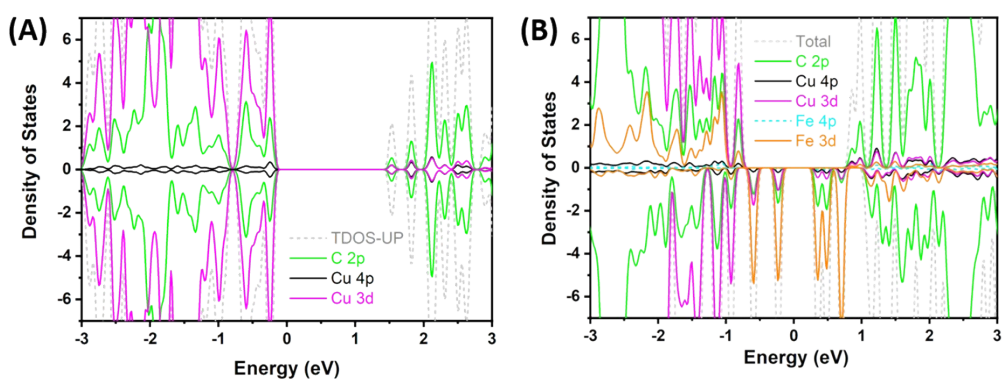

**Figure S11** Calculated density of states (DOS) of PhC<sub>2</sub>Cu (A) and Fe-PhC<sub>2</sub>Cu (B).

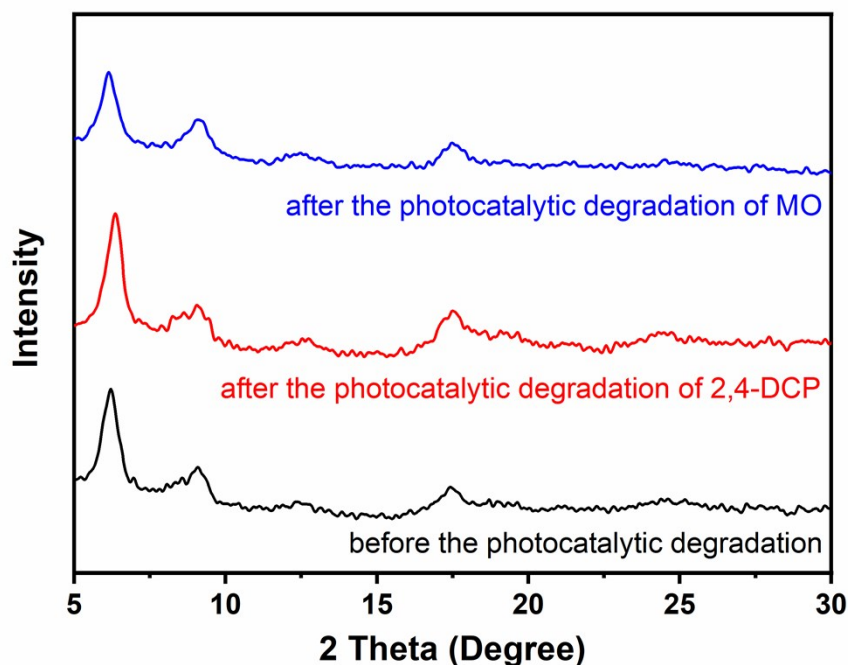

**Figure S12** XRD patterns of 2% Fe/PhC<sub>2</sub>Cu before and after the photocatalytic degradation of 2,4-DCP and MO.

**Table S1** The mole ratios of Fe:Cu for the Fe-PhC<sub>2</sub>Cu samples detected by ICP-OES

| Sample                               | 0% Fe-PhC <sub>2</sub> Cu | 1% Fe-PhC <sub>2</sub> Cu | 2% Fe-PhC <sub>2</sub> Cu | 3% Fe-PhC <sub>2</sub> Cu |
|--------------------------------------|---------------------------|---------------------------|---------------------------|---------------------------|
| $n_{\text{Fe}} : n_{\text{Cu}} (\%)$ | 0.25                      | 1.48                      | 2.01                      | 3.46                      |

**Table S2** The energy band structures of the Fe-PhC<sub>2</sub>Cu samples

| Sample                                 | 0% Fe-PhC <sub>2</sub> Cu | 1% Fe-PhC <sub>2</sub> Cu | 2% Fe-PhC <sub>2</sub> Cu | 3% Fe-PhC <sub>2</sub> Cu |
|----------------------------------------|---------------------------|---------------------------|---------------------------|---------------------------|
| <b>Band Gap<br/>(eV)</b>               | 2.388                     | 2.372                     | 2.365                     | 2.318                     |
| <b>Valence Band<br/>(V vs. SHE)</b>    | 0.638                     | 0.641                     | 0.648                     | 0.711                     |
| <b>Conduction Band<br/>(V vs. SHE)</b> | -1.750                    | -1.731                    | -1.717                    | -1.607                    |

1. P. Hohenberg and W. Kohn, *Phys. Rev.* 1964, **136**, B864
2. P. E. Blöchl, *Phys. Rev. B* 50, 1994, **50**, 17953.
3. G. Kresse and D. Joubert, *Phys. Rev. B* 1999, **59**, 1758.
4. G. Kresse and J. Furthmüller, *Phys. Rev. B* 1996, **54**, 11169.
5. H. J. Monkhorst and J. D. Pack, *Phys. Rev. B* 1976, **13**, 5188.
